# Supplementary material for: First survey of Interstitial molluscs from Cayo Nuevo, Campeche Bank, Gulf of Mexico
Source: Zookeys. 2018 Aug 2;(779):1–17. doi: 10.3897/zookeys.778.24562 (PMC6085400; doi:10.3897/zookeys.778.24562)
Supplement: Supplementary material 1 — Species abundance per sample [file zookeys-779-001-s001.xlsx]

## Sheet: Hoja1
	GoMexPTD-001	GoMexPTD-002	GoMexPTD-003	GoMexPTD-004	GoMexPTD-005	GoMexPTD-006
Class Polyplacophora
Polyplacophora sp. 1		*
Polyplacophora sp. 2				*
Ischnochiton sp.	*
Class Bivalvia
Arcidae sp.						*
Arca imbricata		*			*
Barbatia domingensis	*	*	*		*	*
Bentharca sp.	*
Arcopsis adamsi			*		*
Crenella sp.					*
Anomia sp.*	*
Carditopsis smithii	*	*	*		*
Lucinidae *		*			*
Chama sinuosa			*	*	*
Chama sp.	*
Galeommatidae sp.						*
Chione elevata			*
Semele bellastriata					*
Class Gastropoda
Gastropoda sp. 1 *						*
Gastropoda sp. 2 *		*
Gastropoda sp. 3 *		*	*
Diodora minuta	*		*
Diodora sp. *	*
Scissurella redferni		*	*		*	*
Synaptocochlea picta	*	*		*	*	*
Lodderena ornata	*	*	*	*	*	*
Cerithium sp. *						*
Sansonia tuberculata						*
Iniforis turristhomae	*
Metaxia rugulosa		*
Cerithiopsis cf. iuxtafuniculata						*
Cerithiopsis sp.					*
Vermetidae incertae sedis irregularis	*
Dendropoma corrodens	*
Vermetid sp. C		*		*	*	*
Petaloconchus mcgintyi		*	*
Thylacodes sp.	*
Alvania auberiana		*			*
Alvania colombiana		*	*	*	*	*
Alvania sp.					*
Simulamerelina caribaea	*	*
Schwartziella fischeri	*			*		*
Zebina browniana	*		*		*	*
Zebina sp.	*	*
Caecum circumvolutum		*		*		*
Caecum donmoorei		*	*		*	*
Caecum floridanum	*	*		*	*	*
Caecum johnsoni	*	*	*	*	*	*
Caecum pulchellum	*	*	*
Caecum textile	*
Caecum sp. B		*	*		*	*
Meioceras nitidum	*	*		*		*
Cochliolepis striata		*
Parviturboides interruptus	*	*			*
Vitrinella sp.	*	*		*	*	*
Gibberula lavalleeana					*	*
Prunum apicinum	*	*
Volvarina avena			*
Astyris lunata	*	*
Phrontis albus	*	*
Phrontis sp.						*
Trachypollia sp. ?		*
Turridae sp. 1		*				*
Turridae sp. 2 *		*
Turridae sp. 3 *	*
Ammonicera lineofuscata	*	*	*	*	*	*
Ammonicera minortalis				*	*	*
Rissoella galba				*
Pyramidellidae sp.						*
Pseudoscilla babylonia	*
